# Supplementary material
Source: ML conference proceedings conference paper supplement (https://proceedings.mlr.press/v130/ghosh21a.html)
Supplement: Supplementary file 1 [file ghosh21a-supp.zip]

Archive with 5 entries (4 files):
- 562-supp/Code/
- 562-supp/Code/OFUL_dim_adapt.ipynb
- 562-supp/Code/OFUL_plus_algo.ipynb
- 562-supp/Code/Yahoo! data - OFUL_plus algo.ipynb
- 562-supp/full.pdf
