# Supplementary material
Source: ML conference proceedings conference paper supplement (https://proceedings.mlr.press/v130/ghosh21a.html)
Supplement: Supplementary file 1 [file ghosh21a-supp.zip › 562-supp/Code/OFUL_plus_algo.ipynb]

# %% [markdown]
# Description: 
This is a Jupyter noebook with experiments on the epoch-based algorithm (OSOM). We compare the epoch-based algorithm to the one without epochs (basically Niladri et.al), and show that epoch based scheme has lesser regret compared. 


# %% [code]
#Adaptive setting: Our epoch based algorithm
import numpy as np;
import numpy.random as ra;
import scipy.linalg as sla;
import numpy.linalg as la;
import pdb;
import scipy.io as sio
import matplotlib.pyplot as plt

#parameters
epoch_num = 6
num_trials = 25
N_epoch = 150 # Length of the first epoch
N = N_epoch * ((2** epoch_num) - 1)  # Horizon/number of observations

trial_reg = np.zeros(N)
trial_estnorm = np.zeros(epoch_num)

for trial in range(num_trials):


    N_epoch = 150 # Length of the first epoch
    
    N = N_epoch * ((2** epoch_num) - 1)  # Horizon/number of observations
    d = 50   # number of covariates
    n_a = 75  # number of arms/actions
    S = 5   # norm of theta_star, b in our algorithm
    R = 0.01;
    S_hat = 10 # initial norm estimate of theta_star

    ridge = 0.05;
    delta = 0.006;


    #- generate theta_star
    v = ra.normal(0,1,d);
    v /= la.norm(v)
    theta_star = v * S;


    #norms = la.norm(X);
    #X /= norms.reshape(-1,1)
    #X = X;

    # Bias
    bias = ra.uniform(-1,1,n_a);

    # Pure exploration
    X_p = ra.normal(0,1,(n_a,d));
    reward_p = bias + np.dot(X_p, theta_star) + R * ra.normal(0,1,n_a);
    times = np.ones(n_a);
    avg_reward = reward_p


    XTy = np.zeros(d)
    invVt = np.eye(d) / ridge
    #X_invVt_norm_sq = np.sum(X * X, axis=1) / ridge;
    logdetV = d * np.log(ridge);
    sqrt_beta =  R * np.sqrt( logdetV - d * np.log(ridge) + np.log(1/(delta**2)) ) + np.sqrt(ridge) * S_hat
    theta_hat = np.zeros(d);
    Vt = ridge * np.eye(d); 
    my_c = .1 # Agressiveness (inv)
    my_c1 = 1

    sum_val = 0

    def ofulplus(S_hat, N_epoch, delta, XTy, invVt, logdetV, sqrt_beta, theta_hat, Vt, sum_val):

        X = ra.normal(0,1,(N_epoch, n_a, d)) #- generate X
        # Regret
        cum_reg = np.zeros(N_epoch)
        #- save expected rewards
        expt_reward = np.array([bias, ]*N_epoch) + np.dot(X, theta_star);
        best_arm_vec = np.argmax(expt_reward, axis = 1);

        tilde_mu = avg_reward + (R * 2 * np.sqrt(np.log(n_a/delta)) + S_hat * np.sqrt(2*d * np.sqrt(np.log(1/delta))))


        for t in range(N_epoch):

        #For t = 0 choose randomly

            x = X[t]
            best_arm = best_arm_vec[t]
            X_invVt_norm_sq = np.sum(np.dot(x, invVt) * x, 1)
            obj_func = tilde_mu + np.dot(x, theta_hat)  + my_c * sqrt_beta * np.sqrt(X_invVt_norm_sq) 
            pulled_idx = np.argmax(obj_func);  # Pull the arm with the highest estimated value
            #pulled_idx = np.random.randint(0, n_a)  # Pull a random arm

            xt = x[pulled_idx, :]
            reward = bias[pulled_idx] + np.dot(xt, theta_star) + R * ra.normal(0,1)
            times[pulled_idx] += 1
            term1 = ((1+times[pulled_idx])/(times[pulled_idx]**2))
            term2 = np.log((n_a * np.sqrt(1+times[pulled_idx]))/delta)
            term3 = R * np.sqrt(term1 *(1+2 * term2))
            term4 = S_hat * np.sqrt((2*d/times[pulled_idx]) * np.log(1/delta))
            tilde_mu[pulled_idx] = (((times[pulled_idx] - 1)*avg_reward[pulled_idx]) + reward)/times[pulled_idx] + term3 + term4

            reg = bias[best_arm] + np.dot(x[best_arm,:],theta_star) - bias[pulled_idx] - np.dot(xt, theta_star)
            sum_val = sum_val + reg

            cum_reg[t] = sum_val

            XTy += reward * xt
            Vt += np.outer(xt, xt);

            tempval1 = np.dot(invVt, xt)    # d by 1, O(d^2)
            tempval2 = np.dot(tempval1, xt)      # scalar, O(d)
            logdetV += np.log(1 + tempval2);

            if (t % 5000 == 0):
                invVt = la.inv(Vt);
        #		X_invVt_norm_sq -= (np.dot(x, tempval1) ** 2) / (1 + tempval2) # efficient update, O(Nd)
            else:
                invVt -= np.outer(tempval1, tempval1) / (1 + tempval2) 
        #       X_invVt_norm_sq -= (np.dot(x, tempval1) ** 2) / (1 + tempval2) # efficient update, O(Nd)

            theta_hat = np.dot(invVt, XTy)
            #print(theta_hat)

            sqrt_beta = R * np.sqrt( logdetV - d * np.log(ridge) + np.log(1/(delta**2)) ) + np.sqrt(ridge) * S_hat

        S_hat = la.norm(theta_hat) + my_c1 * sqrt_beta

        return theta_hat, S_hat, cum_reg, XTy, invVt, logdetV, sqrt_beta, Vt, sum_val


    tot_reg = []
    est_norm = []

    for i in range(epoch_num):
        theta_hat, S_hat, cum_reg, XTy, invVt, logdetV, sqrt_beta, Vt, sum_val = ofulplus(S_hat, N_epoch, delta, XTy, invVt, logdetV, sqrt_beta, theta_hat, Vt, sum_val)

        N_epoch = 2*N_epoch
        delta = delta/2
        est_norm.append(S_hat)
        tot_reg = np.concatenate((tot_reg,cum_reg), axis=None)

    trial_reg = trial_reg + tot_reg 
    trial_estnorm = trial_estnorm + est_norm


avg_trial_reg = trial_reg/num_trials
avg_estnorm = trial_estnorm/num_trials

plt.plot(avg_trial_reg)
plt.show()  

plt.plot(avg_estnorm)
plt.plot()

# %% [markdown]
# Save the Results:
Here we save the results obtained from the previous experiment: In particular we have

num_epoch = 6

N_epoch = 100 # Length of the first epoch
    
N = N_epoch * ((2** epoch_num) - 1)  # Horizon/number of observations

d = 50   # number of covariates
n_a = 75  # number of arms/actions
S = 1 /0.1 / 5  # norm of theta_star, b in our algorithm
R = 0.01;
S_hat = 10 # initial norm estimate of theta_star

ridge = 0.3; (0.1 for the 0.1 case, 0.05 for 5 case)
delta = 0.05; (0.006 for 5 case)


# %% [code]
import scipy.io as sio
import numpy as np

fname1='OSOM_ep_6_reg_5_10'

my_a={}
my_a['reg']=np.array(avg_trial_reg)
sio.savemat(fname1,my_a)

fname2 = 'OSOM_ep_6_theta_est_5_10'
my_b={}
my_b['reg']=np.array(avg_estnorm)
sio.savemat(fname2,my_b)

# %% [code]
N

# %% [markdown]
# OSOM:
This is the epoch-less version of the above algorithm. Basically the OSOM algorithm of Niladri. et al.
    

# %% [code]
# Non-adaptive setting: Basically OSOM algorithm
import numpy as np;
import numpy.random as ra;
import scipy.linalg as sla;
import numpy.linalg as la;
import pdb;
import matplotlib.pyplot as plt
#import emd


#parameters
N = 9450
num_trials = 15
tot_reg = np.zeros(N)

for trial in range(num_trials):

    N = 9450  # Horizon/number of observations
    d = 50   # number of covariates
    n_a = 75  # number of arms/actions
    S = 0.1   # norm of theta_star, b in our algorithm
    R = 0.01;
    
    ridge = 0.01;
    delta = 0.01;
    S_hat = 0.1; # upper bound on the norm of theta_star

        #- generate theta_star
    v = ra.normal(0,1,d);
    v /= la.norm(v)
    theta_star = v * S;

        #- generate X
    X = ra.normal(0,1,(N, n_a, d));
    #norms = la.norm(X);
    #X /= norms.reshape(-1,1)
    #X = X;
    bias = ra.uniform(-1,1,n_a);

     # Pure exploration
    X_p = ra.normal(0,1,(n_a,d));
    reward_p = bias + np.dot(X_p, theta_star) + R * ra.normal(0,1,n_a);
    times = np.ones(n_a);
    avg_reward = reward_p


    #- save expected rewards
    expt_reward = np.array([bias, ]*N) + np.dot(X, theta_star);
    best_arm_vec = np.argmax(expt_reward, axis = 1);


    def calc_sqrt_beta_det2(d,t,R,ridge,delta,S_hat,logdetV):
      return R * np.sqrt( logdetV - d * np.log(ridge) + np.log(1/(delta**2)) ) + np.sqrt(ridge) * S_hat

    
    t = 1;

    XTy = np.zeros(d)
    invVt = np.eye(d) / ridge
    #X_invVt_norm_sq = np.sum(X * X, axis=1) / ridge;
    logdetV = d * np.log(ridge);
    sqrt_beta = calc_sqrt_beta_det2(d,t,R,ridge,delta,S_hat,logdetV);      
    theta_hat = np.zeros(d);
    Vt = ridge * np.eye(d); 
    my_c = .1 # Agressiveness (inv)

    tilde_mu = avg_reward + R * 2 * np.sqrt(np.log(n_a/delta)) + S_hat * np.sqrt(2*d * np.sqrt(np.log(1/delta)))

    # Regret
    cum_reg = np.zeros(N)
    sum_val = 0

    for t in range(N):

    #For t = 0 choose randomly

        x = X[t]
        best_arm = best_arm_vec[t]
    #	X_invVt_norm_sq = np.sum(x * x, axis=1) / ridge;
        X_invVt_norm_sq = np.sum(np.dot(x, invVt) * x, 1)
        obj_func = tilde_mu + np.dot(x, theta_hat)  + my_c * sqrt_beta * np.sqrt(X_invVt_norm_sq) 
        pulled_idx = np.argmax(obj_func);  # Pull the arm with the highest estimated value
        #pulled_idx = np.random.randint(0, n_a)  # Pull a random arm

        xt = x[pulled_idx, :]
        reward = bias[pulled_idx] + np.dot(xt, theta_star) + R * ra.normal(0,1)
        times[pulled_idx] += 1
        term1 = ((1+times[pulled_idx])/(times[pulled_idx]**2))
        term2 = np.log((n_a * np.sqrt(1+times[pulled_idx]))/delta)
        term3 = R * np.sqrt(term1 *(1+2 * term2))
        term4 = S_hat * np.sqrt((2*d/times[pulled_idx]) * np.log(1/delta))
        tilde_mu[pulled_idx] = (((times[pulled_idx] - 1)*avg_reward[pulled_idx]) + reward)/times[pulled_idx] + term3 + term4

        reg = bias[best_arm] + np.dot(x[best_arm,:],theta_star) - bias[pulled_idx] - np.dot(xt, theta_star)
        sum_val = sum_val + reg

        cum_reg[t] = sum_val

        XTy += reward * xt
        Vt += np.outer(xt, xt);

        tempval1 = np.dot(invVt, xt)    # d by 1, O(d^2)
        tempval2 = np.dot(tempval1, xt)      # scalar, O(d)
        logdetV += np.log(1 + tempval2);

        if (t % 200 == 0):
            invVt = la.inv(Vt);
    #		X_invVt_norm_sq -= (np.dot(x, tempval1) ** 2) / (1 + tempval2) # efficient update, O(Nd)
        else:
            invVt -= np.outer(tempval1, tempval1) / (1 + tempval2) 
    #       X_invVt_norm_sq -= (np.dot(x, tempval1) ** 2) / (1 + tempval2) # efficient update, O(Nd)

        theta_hat = np.dot(invVt, XTy)
        #print(theta_hat)
        my_t = t + 1

        sqrt_beta = calc_sqrt_beta_det2(d, my_t, R, ridge, delta, S_hat, logdetV);
        
    tot_reg = tot_reg + cum_reg
    


avg_trial_reg = tot_reg/num_trials

plt.plot(avg_trial_reg)
plt.show()  

# %% [code]
import scipy.io as sio
import numpy as np

fname1='oracle_reg_0.1'

my_c={}
my_c['reg']=np.array(avg_trial_reg)
sio.savemat(fname1,my_c)

# %% [code]
